# Supplementary material for: Bidirectional causal relational between frailty and mental illness: a two-sample Mendelian randomization study
Source: PubMed Central journal article supplement (PMC11190300; doi:10.3389/fpsyt.2024.1397813), 2024-06-07

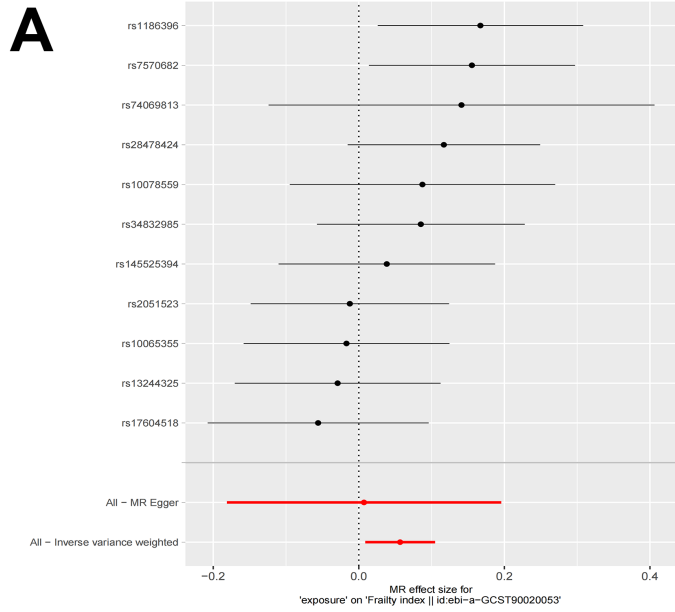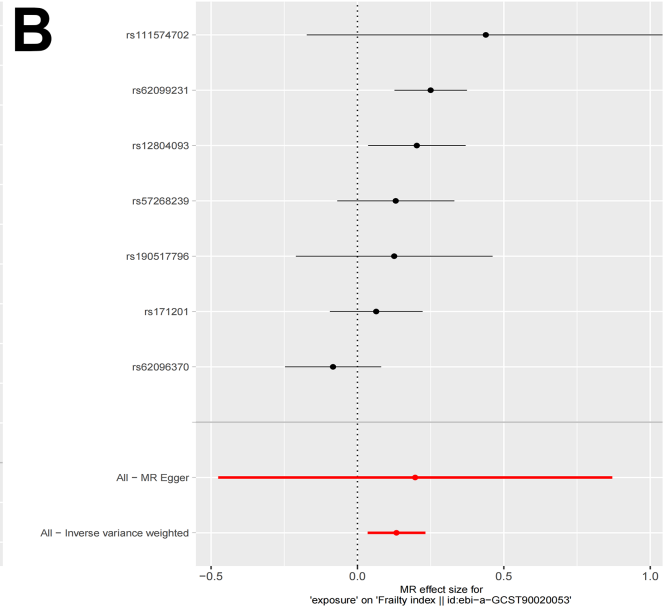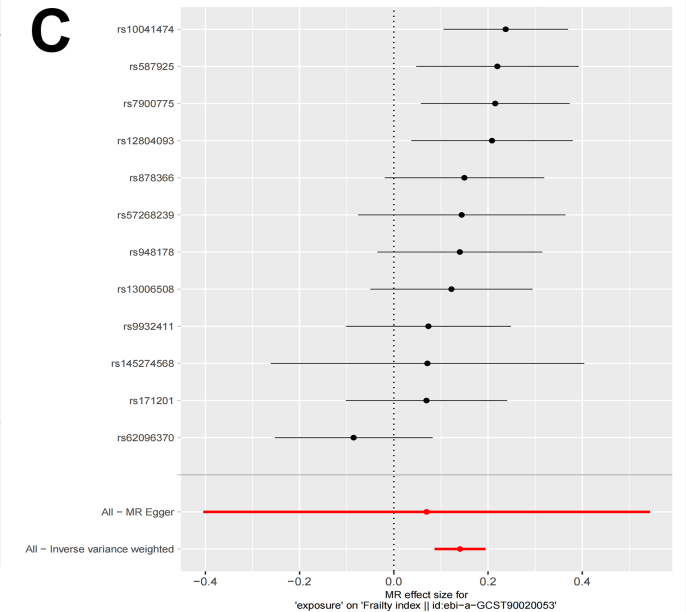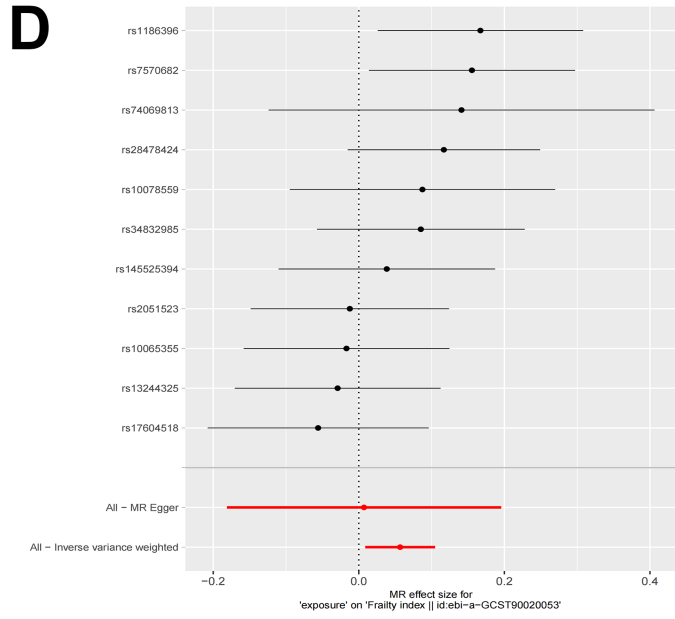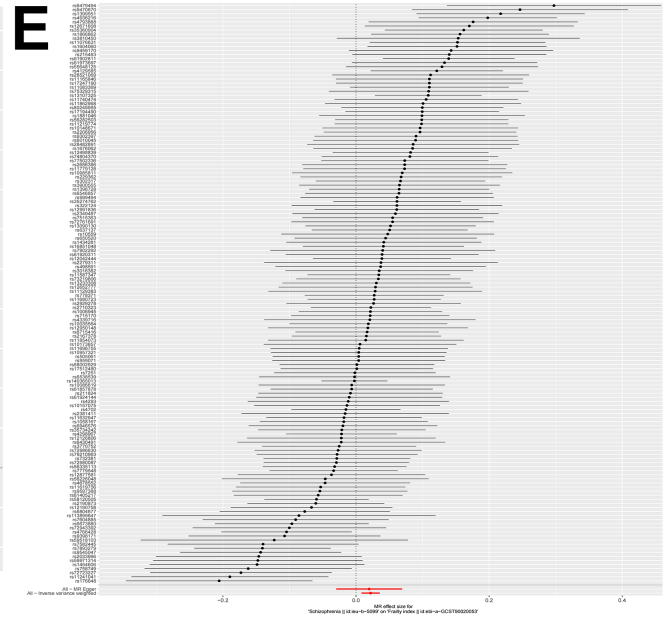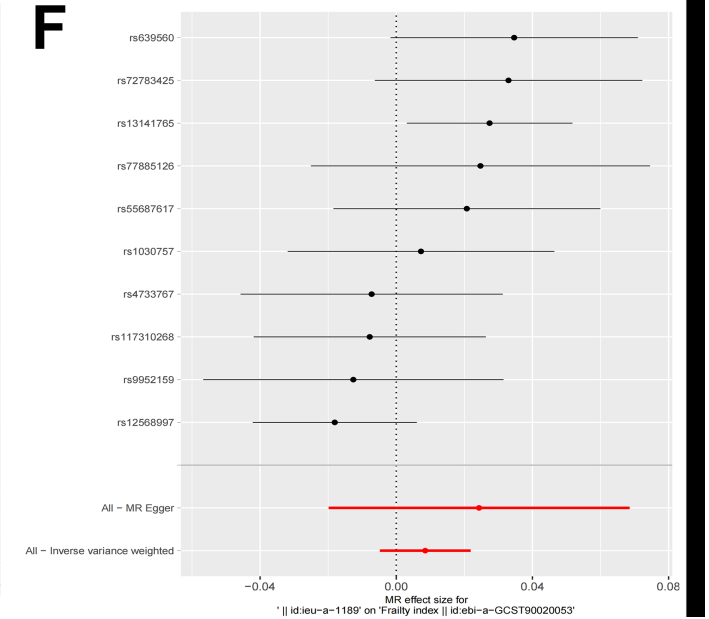

Supplement: Image_6.pdf [file Image_6.pdf]
